# Supplementary material for: To boldly gulp: standard metabolic rate and boldness have context-dependent influences on risk-taking to breathe air in a catfish
Source: Oxford University Press journal article supplement (doi:10.1242/jeb.122903), 2015-12-01
Supplement: jeb122903supp.pdf [file jeb122903supp.pdf]

### Figure 1 Supplementary Material.

Evidence for two response phenotypes in time to resume air-breathing after a fearful stimulus (T-res) in a group of juvenile *Clarias gariepinus* ( $n = 29$ ). Graph is a frequency distribution of response times, classified into 20 min bins, of the time intervals within which animals resumed air breathing. Individuals either resumed air breathing in less than 75 min (mean  $\pm$  SE =  $37 \pm 5$  min,  $n = 13$ ) or in greater than 115 min (mean =  $182 \pm 14$  min,  $n = 16$ ). Raw data are carried below the graph.

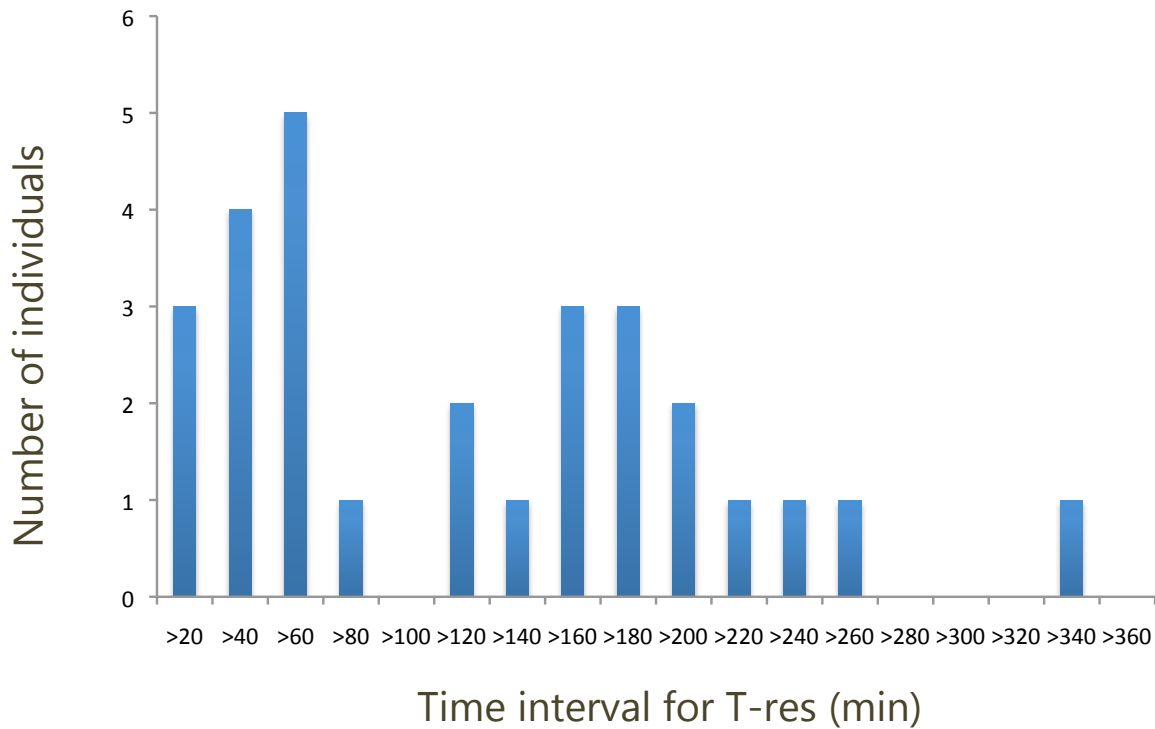

| Bold T-res Phenotypes n = 13 |              | Shy T-res phenotypes n = 16 |               |
|------------------------------|--------------|-----------------------------|---------------|
| Fish ID                      | T-res        | FISH ID                     | T-res         |
| 34                           | 7            | 15                          | 115           |
| 8                            | 15           | 7                           | 117           |
| 1                            | 20           | 11                          | 135           |
| 6                            | 27           | 21                          | 147           |
| 5                            | 30           | 22                          | 148           |
| 10                           | 32           | 23                          | 148           |
| 2                            | 35           | 25                          | 164           |
| 28                           | 44           | 30                          | 179           |
| 26                           | 45           | 31                          | 180           |
| 33                           | 47           | 13                          | 183           |
| 27                           | 48           | 17                          | 195           |
| 29                           | 59           | 20                          | 195           |
| 32                           | 75           | 18                          | 206           |
| mean                         | <b>37,26</b> | 19                          | 225           |
| SE                           | <b>5,34</b>  | 14                          | 244           |
|                              |              | 24                          | 325           |
|                              |              | mean                        | <b>181,65</b> |
|                              |              | SE                          | <b>13,64</b>  |
